# Supplementary material for: Superabsorbent enhanced-catalytic core/shell nanocomposites hydrogels for efficient water decolorization
Source: Royal Society of Chemistry journal article supplement (doi:10.1039/c5nj02823j), 2016-01-01
Supplement: c5nj02823j1.pdf [file c5nj02823j1.pdf]

*Electronic supplementary information*

## **Superabsorbent Enhanced-Catalytic Core/Shell Nanocomposites Hydrogel for Efficient Water Decolorization**

*Rania E. Morsi\* and Radwa A. Elsalamony*

*Egyptian Petroleum Research Institute, Cairo, 11727, Egypt*

Supplementary Data

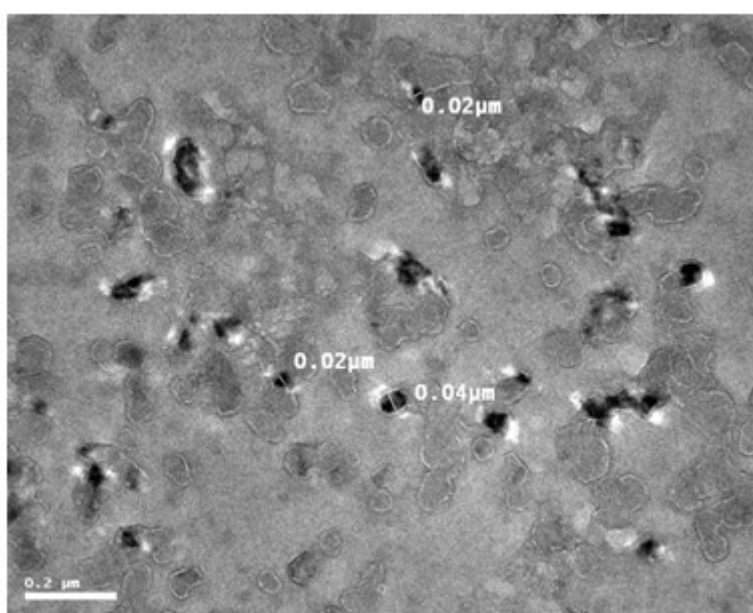

Figure S1: TEM image of the TiO<sub>2</sub>/PAM core/shell nanocomposite.

---

\* Corresponding author: raniaelsayed@yahoo.com
